# Supplementary material for: Ultra-wide temperature cycle control based on photo-responsive phase change
Source: Royal Society of Chemistry journal article supplement (doi:10.1039/d4ta04540h), 2024-01-01
Supplement: d4ta04540h1.pdf [file d4ta04540h1.pdf]

## Ultra-Wide Temperature Cycle Control Based on Photo-responsive Phase-Change

Jing Ge,<sup>a</sup> Xiaoyu Yang,<sup>a</sup> Zedong Wang,<sup>a</sup> Yiyu Feng,<sup>\*a</sup> Wei Feng<sup>\*a</sup>

<sup>a</sup>School of Materials Science and Engineering and Tianjin Key Laboratory of Composite and Functional Materials, Tianjin University, Tianjin 300350, P. R. China.

\*Corresponding author E-mail:

fengyiyu@tju.edu.cn (Y. Feng)

weifeng@tju.edu.cn (W. Feng)

### Supplementary Figures and Results

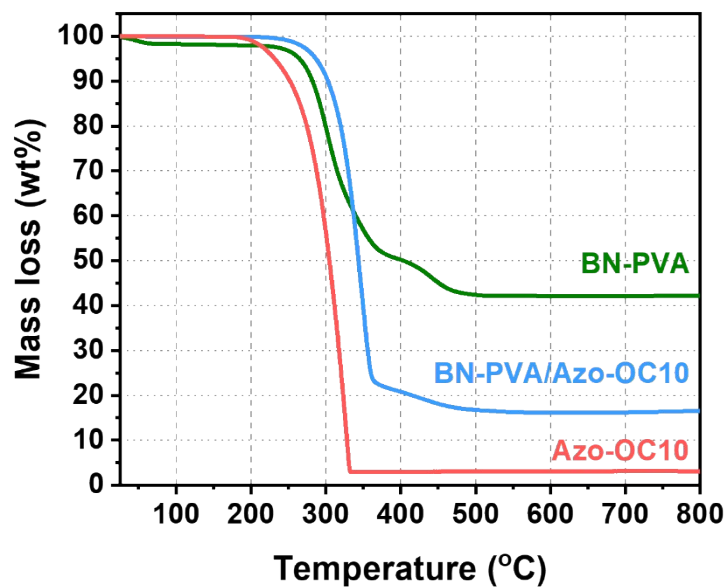

**Fig. S1** TGA curves of BN-PVA, BN-PVA/Azo-OC10, and Azo-OC10 (10 °C/min, N<sub>2</sub> atmosphere).

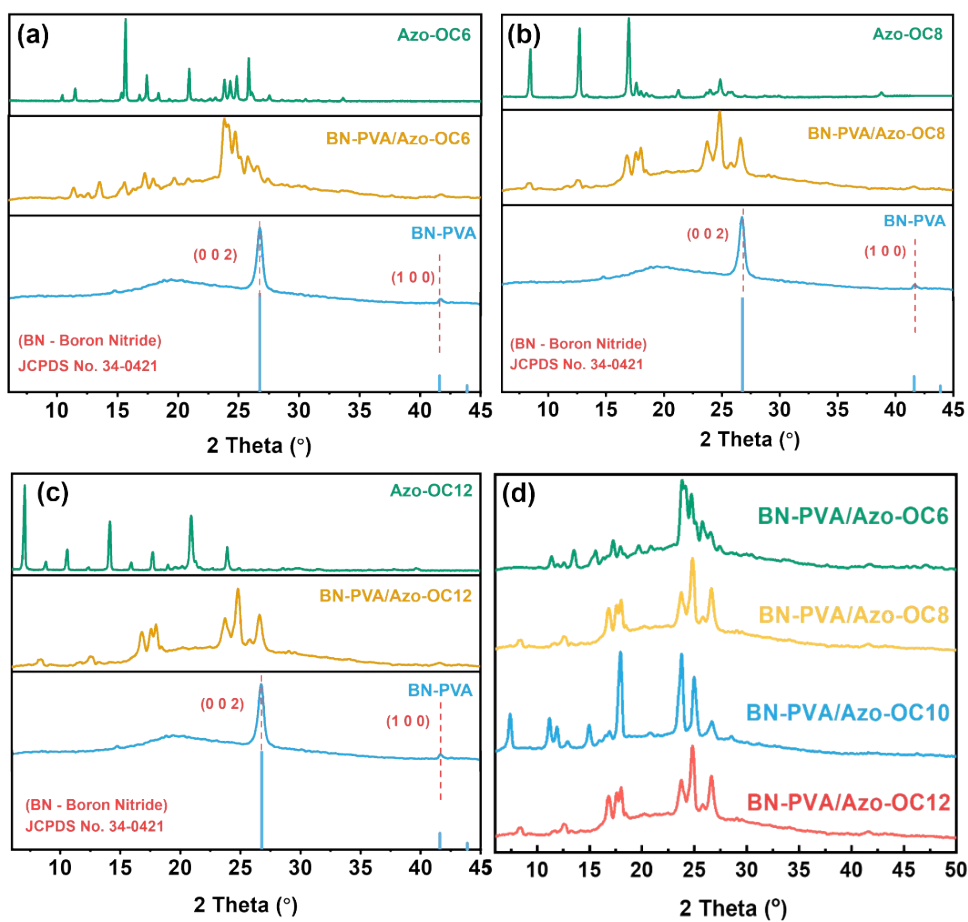

**Fig. S2** XRD comparison of (a) Azo-OC<sub>6</sub>, BN-PVA aerogel, and BN-PVA/Azo-OC<sub>6</sub> composite aerogel; (b) Azo-OC<sub>8</sub>, BN-PVA aerogel, and BN-PVA/Azo-OC<sub>8</sub> composite aerogel; and (c) Azo-OC<sub>12</sub>, BN-PVA aerogel, and BN-PVA/Azo-OC<sub>12</sub> composite aerogel at 2θ ranging from 5° to 45°. (d) XRD curves of BN-PVA/Azo-OC<sub>n</sub> composite aerogels filled with Azo-OC<sub>n</sub> molecules of different chain lengths (n=6, 8, 10, 12).

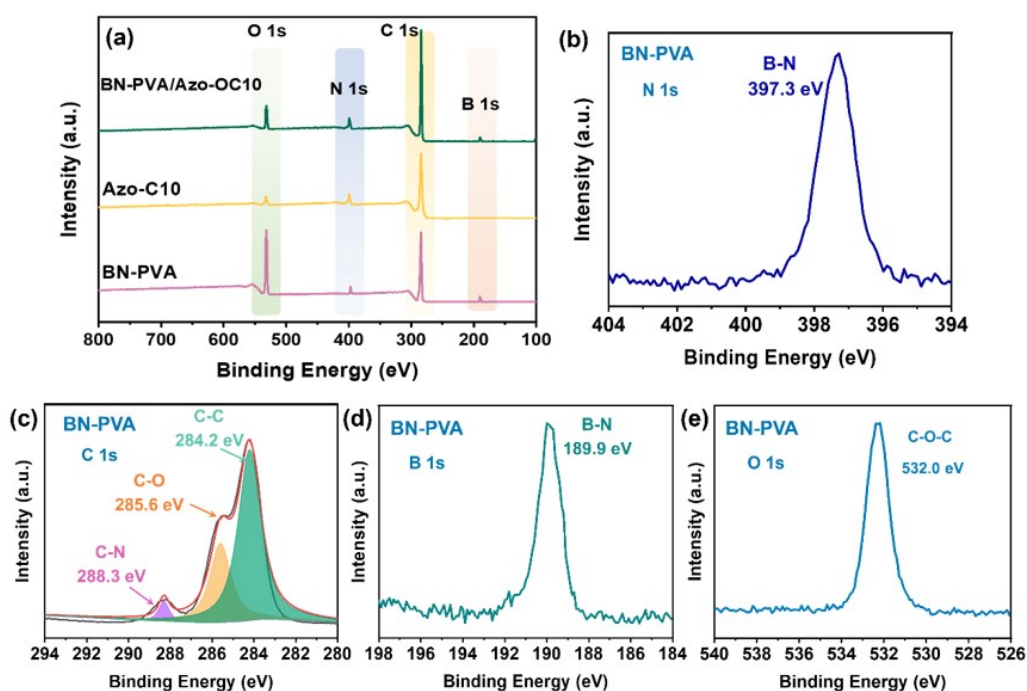

**Fig. S3** (a) The wide-scan, N1s, O 1s, B 1s, and C1s core-level XPS spectra of BN-PVA, Azo-OC10, and BN-PVA/Azo-OC10 aerogel samples. (b) N 1s, (c) C 1s, (d) B 1s, and (e) O 1s region spectra of the BN-PVA aerogel.

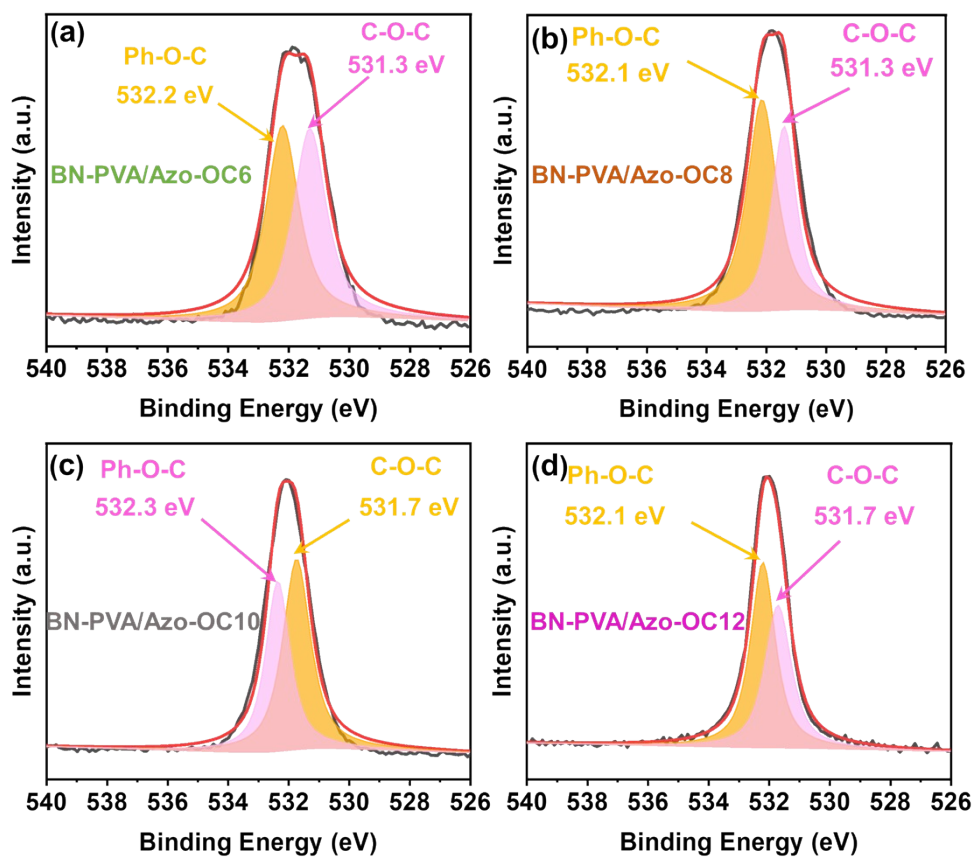

**Fig. S4** O 1s XPS spectra of (a) BN-PVA/Azo-OC6, (b) BN-PVA/Azo-OC8, (c) BN-PVA/Azo-OC10, and (d) BN-PVA/Azo-OC12.

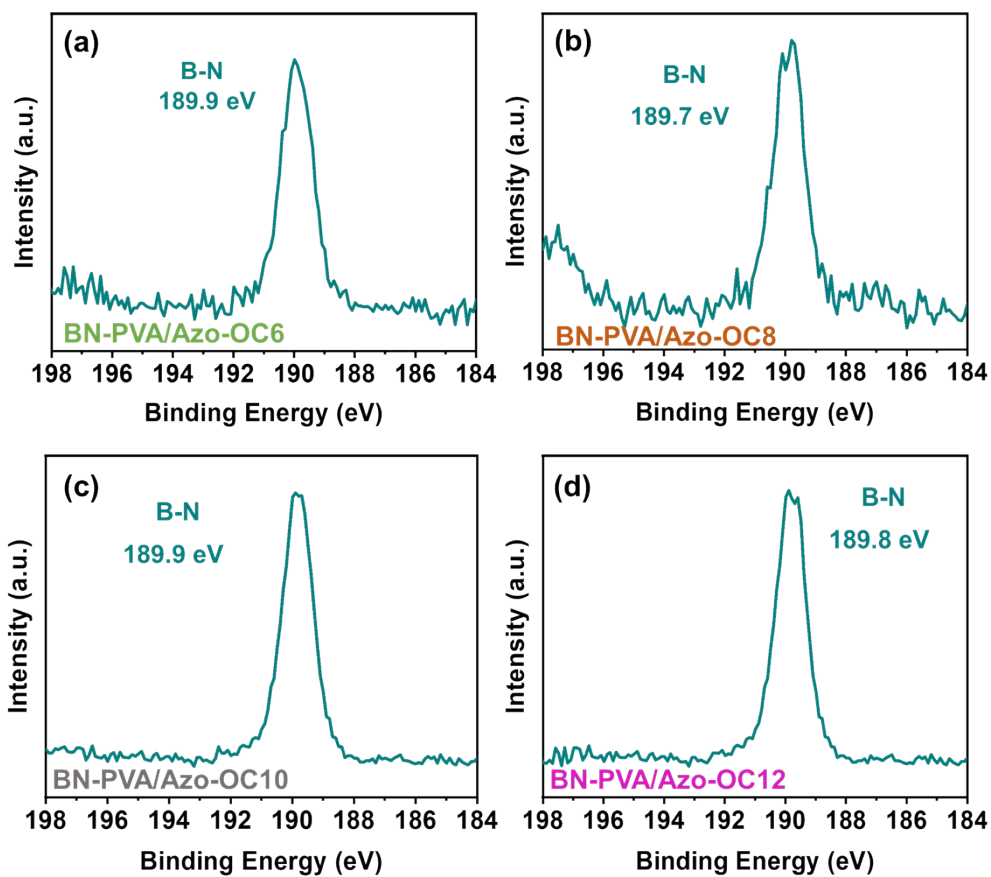

**Fig. S5** B 1s XPS spectra of (a) BN-PVA/Azo-OC6, (b) BN-PVA/Azo-OC8, (c) BN-PVA/Azo-OC10, and (d) BN-PVA/Azo-OC12.

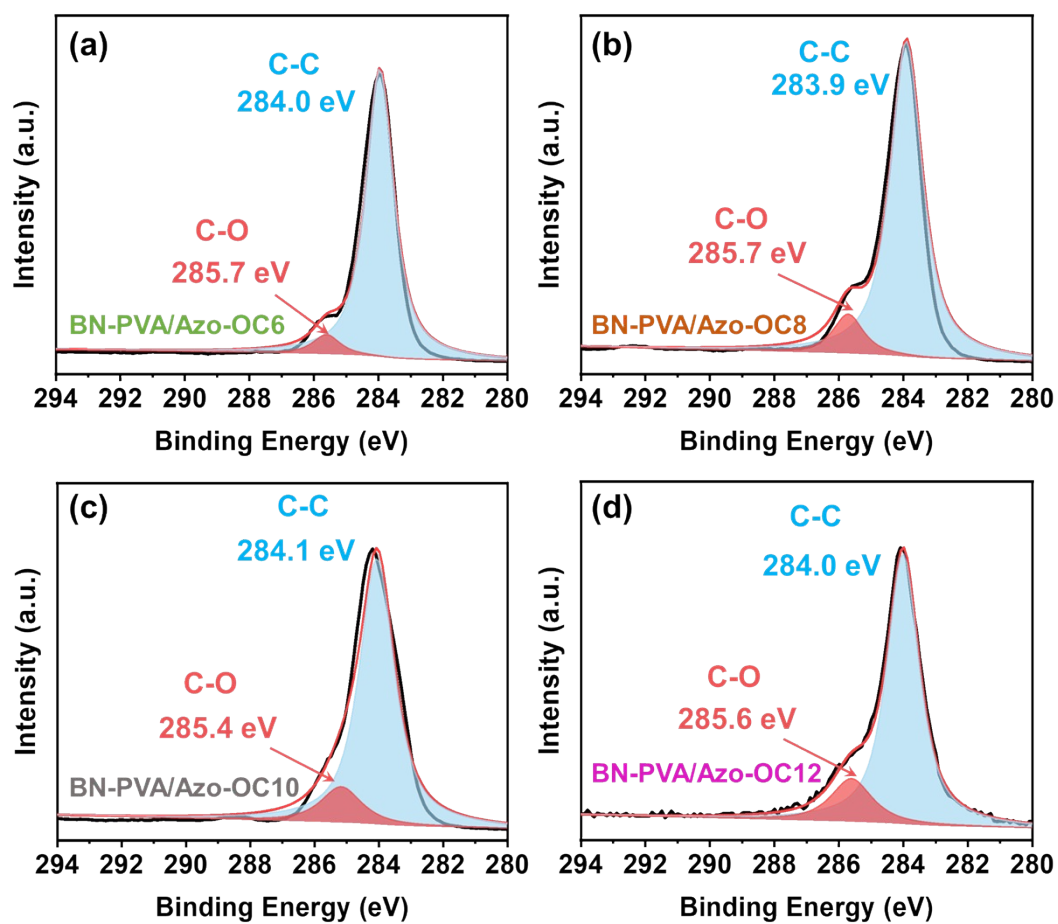

**Fig. S6** C 1s XPS spectra of (a) BN-PVA/Azo-OC6, (b) BN-PVA/Azo-OC8, (c) BN-PVA/Azo-OC10, and (d) BN-PVA/Azo-OC12.

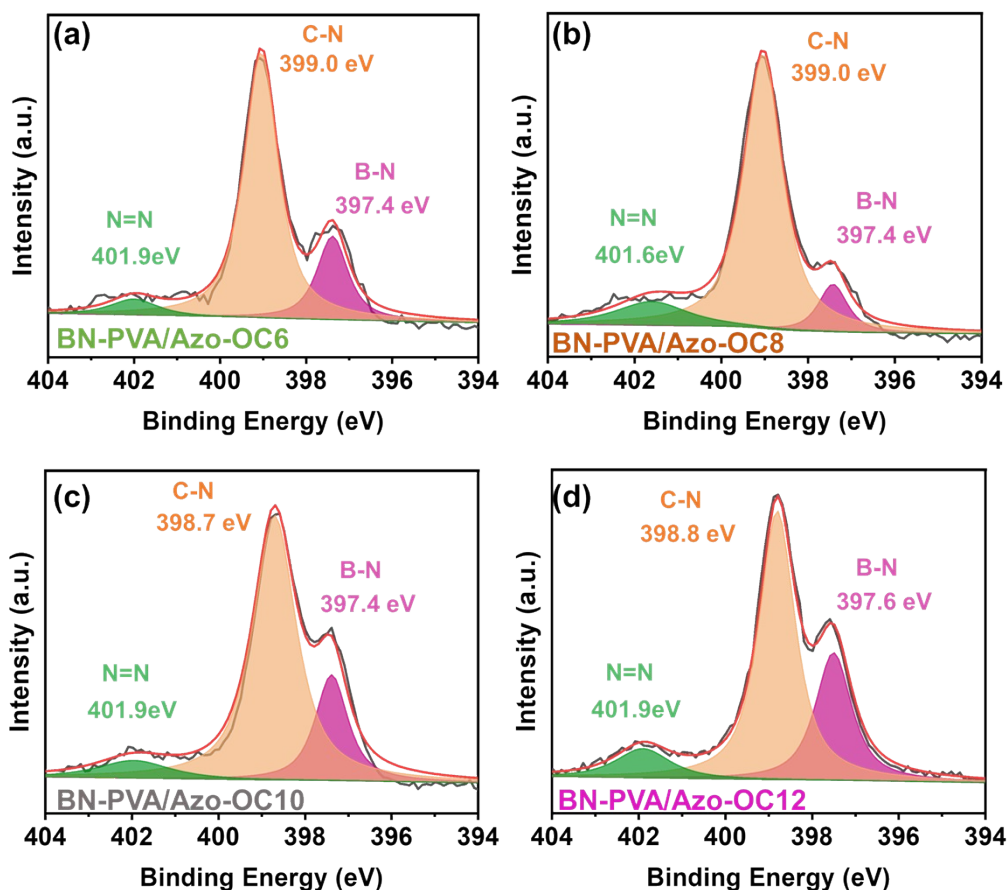

Fig. S7 N 1s XPS spectra of (a) BN-PVA/Azo-OC<sub>6</sub>, (b) BN-PVA/Azo-OC<sub>8</sub>, (c) BN-PVA/Azo-OC<sub>10</sub>, and (d) BN-PVA/Azo-OC<sub>12</sub>.

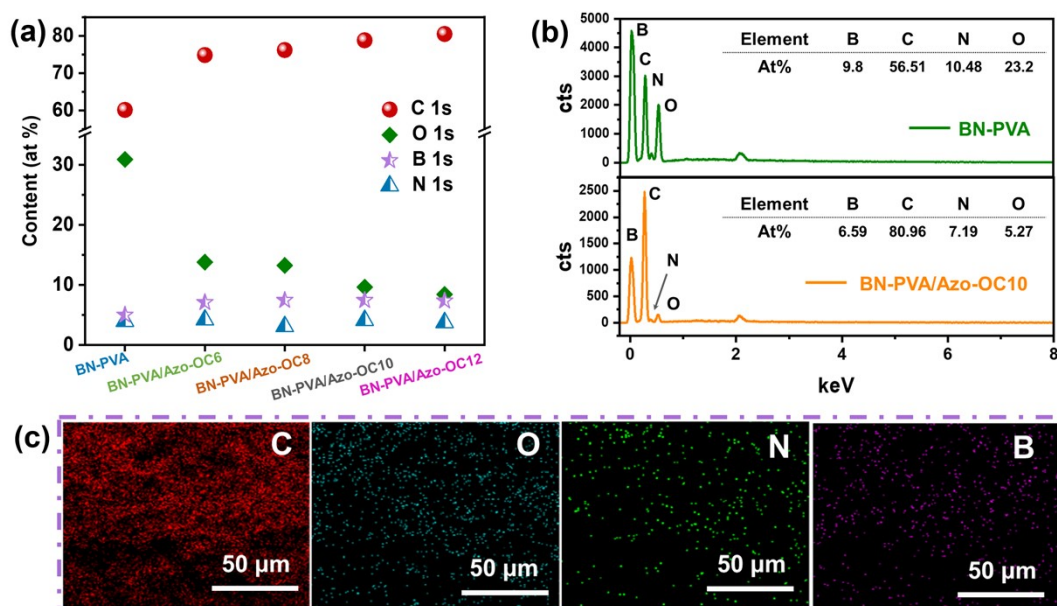

Fig. S8 (a) Composition contents of BN-PVA and BN-PVA/Azo-OC<sub>n</sub> ( $n = 6, 8, 10, 12$ )

aerogels from the XPS spectra. (b) EDS results of BN-PVA and BN-PVA/Azo-OC10. (c) The EDS mapping of the BN-PVA/Azo-OC10 composite aerogel.

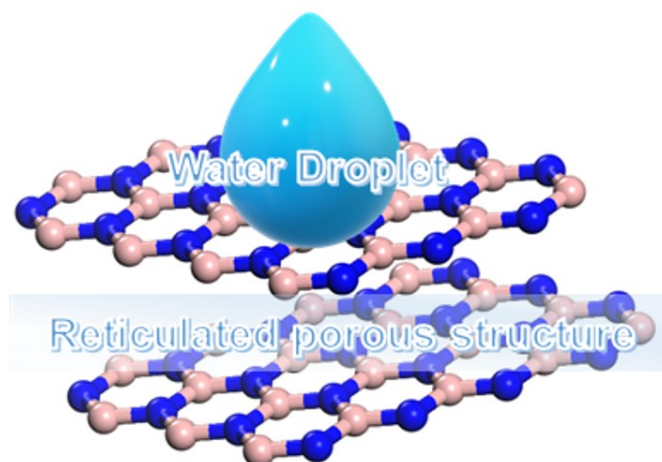

**Fig. S9** Schematic illustration of the attachment state of water droplets to BN-PVA aerogel at  $t=0s$ .

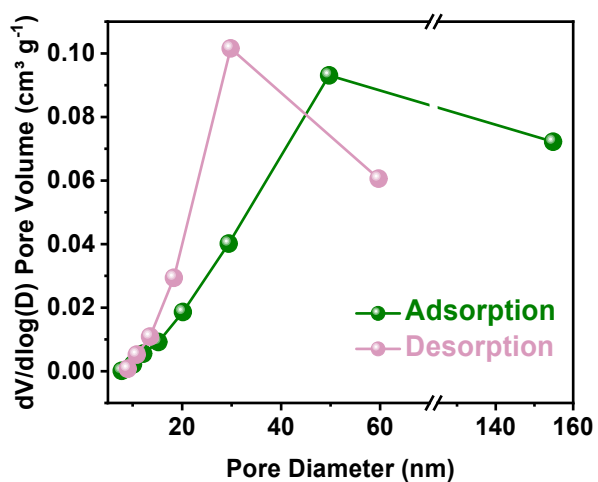

**Fig. S10** The pore size distribution of BN-PVA.

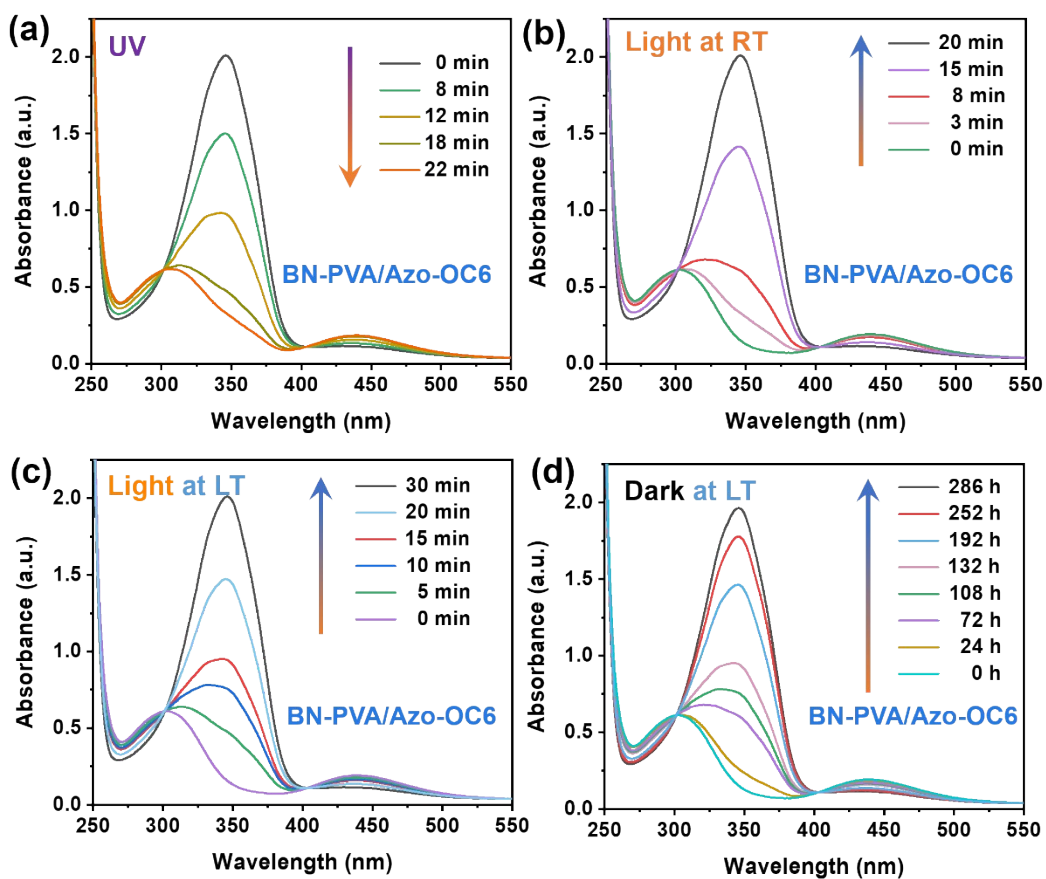

**Fig. S11** Time-evolved UV-vis absorption spectra of BN-PVA/Azo-OC6 under (a) UV light irradiation, (b) light at RT (25.7 °C), (c) light at low temperature LT (-20 °C), and (d) dark environment at LT (-20 °C).



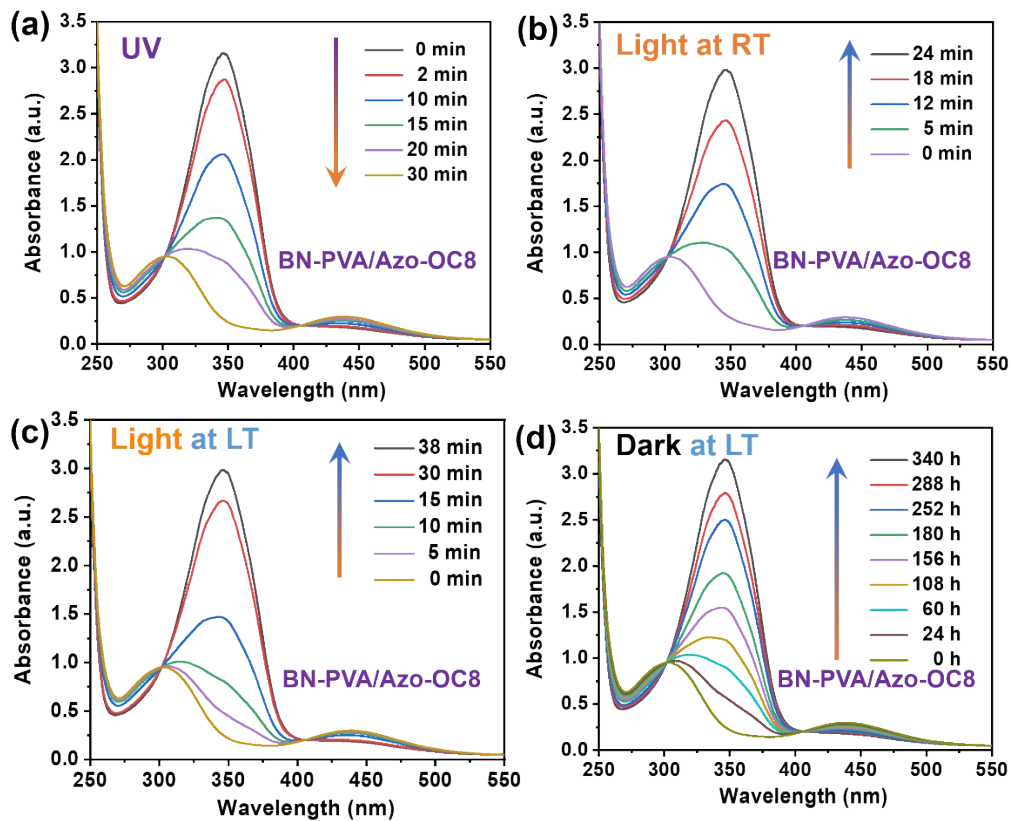

**Fig. S12** Time-evolved UV-vis absorption spectra of BN-PVA/Azo-OC8 under (a) UV light irradiation, (b) light at RT (25.7 °C), (c) light at low temperature LT (-20 °C), and (d) dark environment at LT (-20 °C).

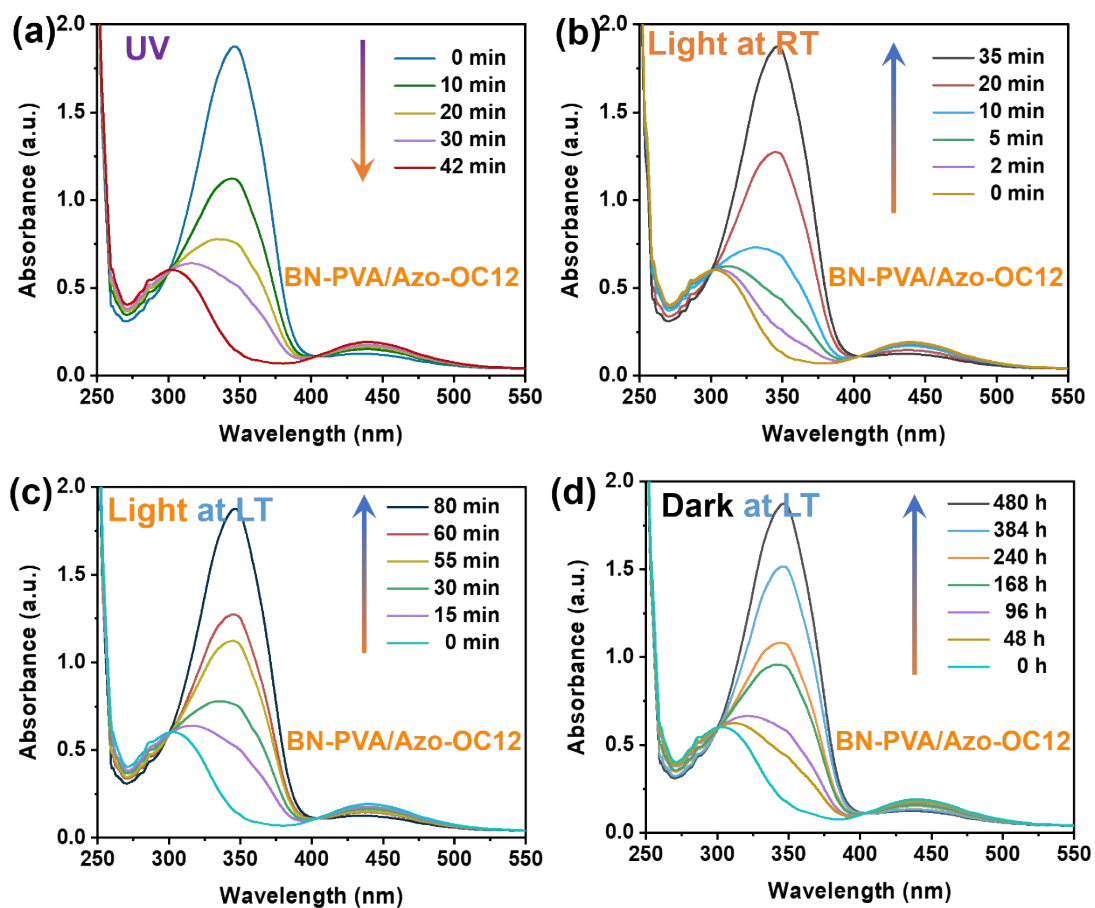

**Fig. S13** Time-evolved UV-vis absorption spectra of BN-PVA/Azo-OC12 under (a) UV light irradiation, (b) light at RT (25.7 °C), (c) light at low temperature LT (-20 °C), and (d) dark environment at LT (-20 °C).

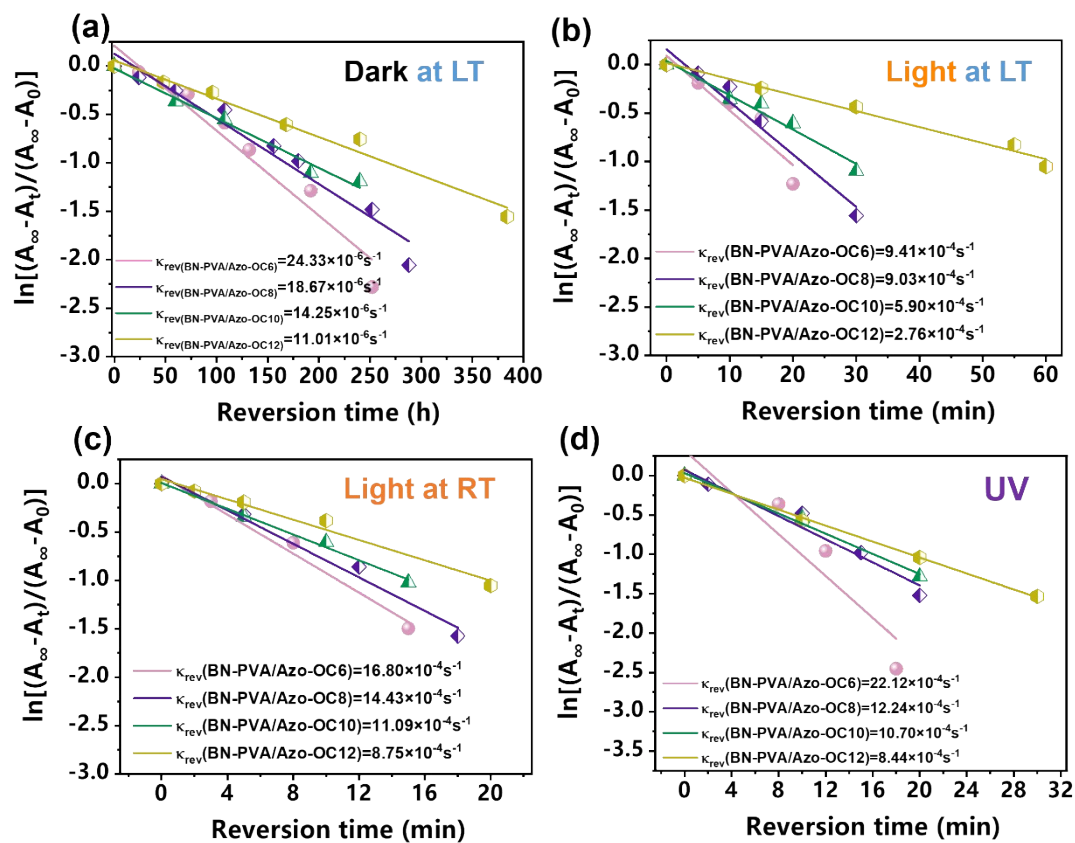

**Fig. S14** (a)-(c) The Z-to-E isomerization rate constants ( $\kappa_{rev}$ ) of BN-PVA/Azo-OCn ( $n=6, 8, 10, 12$ ) under dark at LT, light at LT, and light at RT conditions, respectively. (d) The E-to-Z isomerization rate constants ( $\kappa_{rev}$ ) of BN-PVA/Azo-OCn ( $n=6, 8, 10, 12$ ) under UV light conditions.

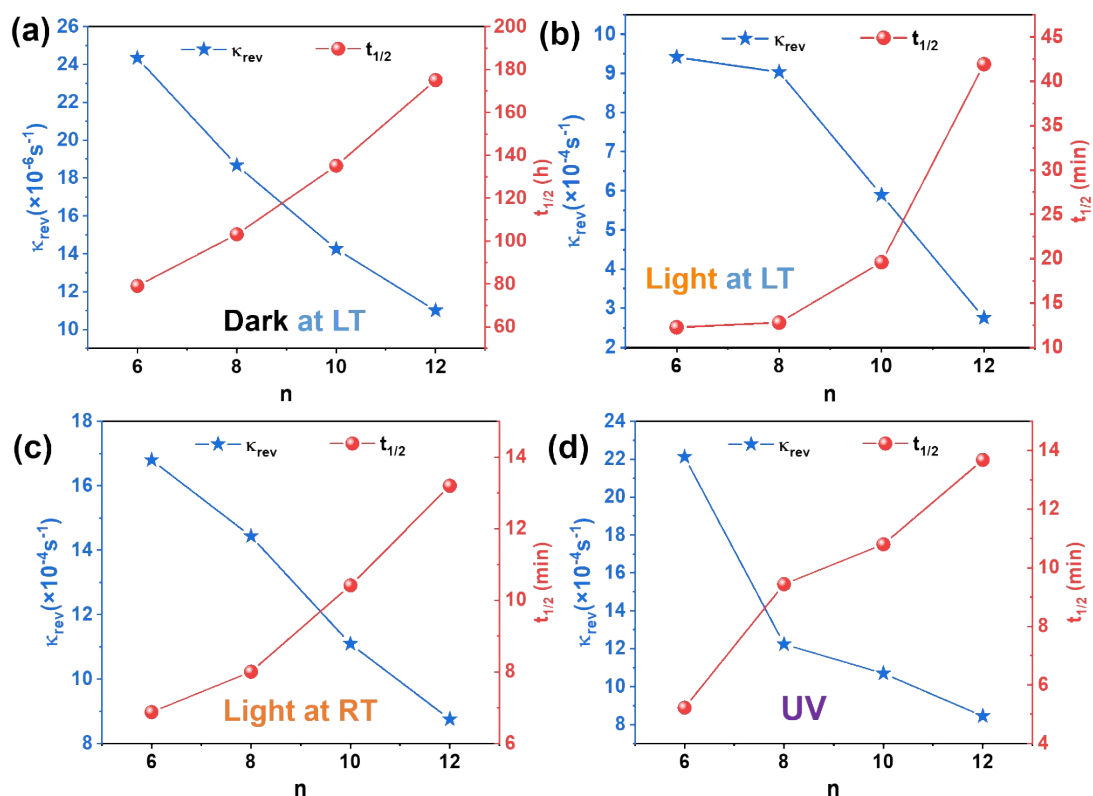

**Fig. S15** (a)-(c) Relationship between the Z-to-E isomerization rate constants ( $\kappa_{\text{rev}}$ ), half-lives ( $t_{1/2}$ ), and different Alkoxy chain length ( $n$ ,  $n=6, 8, 10, 12$ ) under dark at LT, light at LT, and light at RT conditions, respectively. (d) The E-to-Z isomerization under UV light conditions.

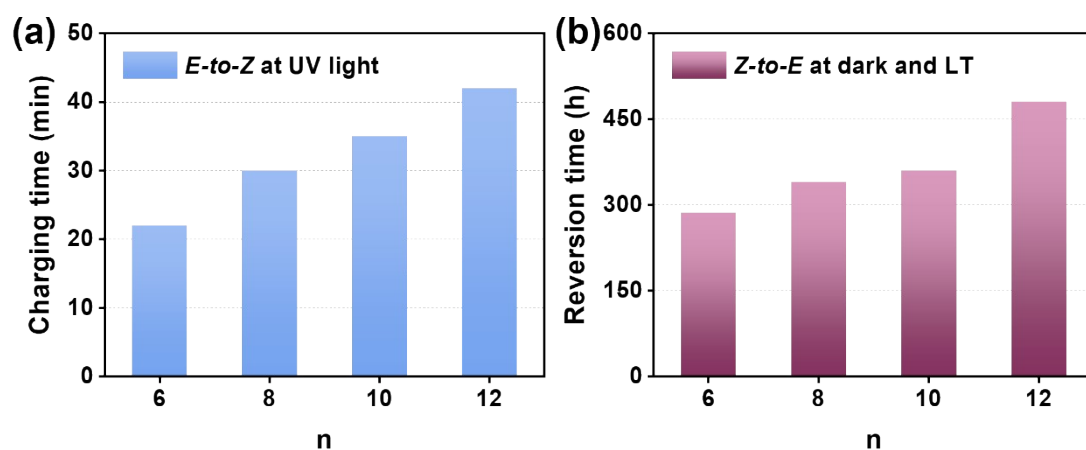

**Fig. S16** (a) The bar chart of charging time of BN-PVA/Azo-OC $n$  ( $n=6, 8, 10, 12$ ) under UV light (365 nm). (b) The bar chart of reversion time of BN-PVA/Azo-OC $n$  ( $n=6, 8, 10, 12$ ) under dark and LT (-20 °C) conditions.

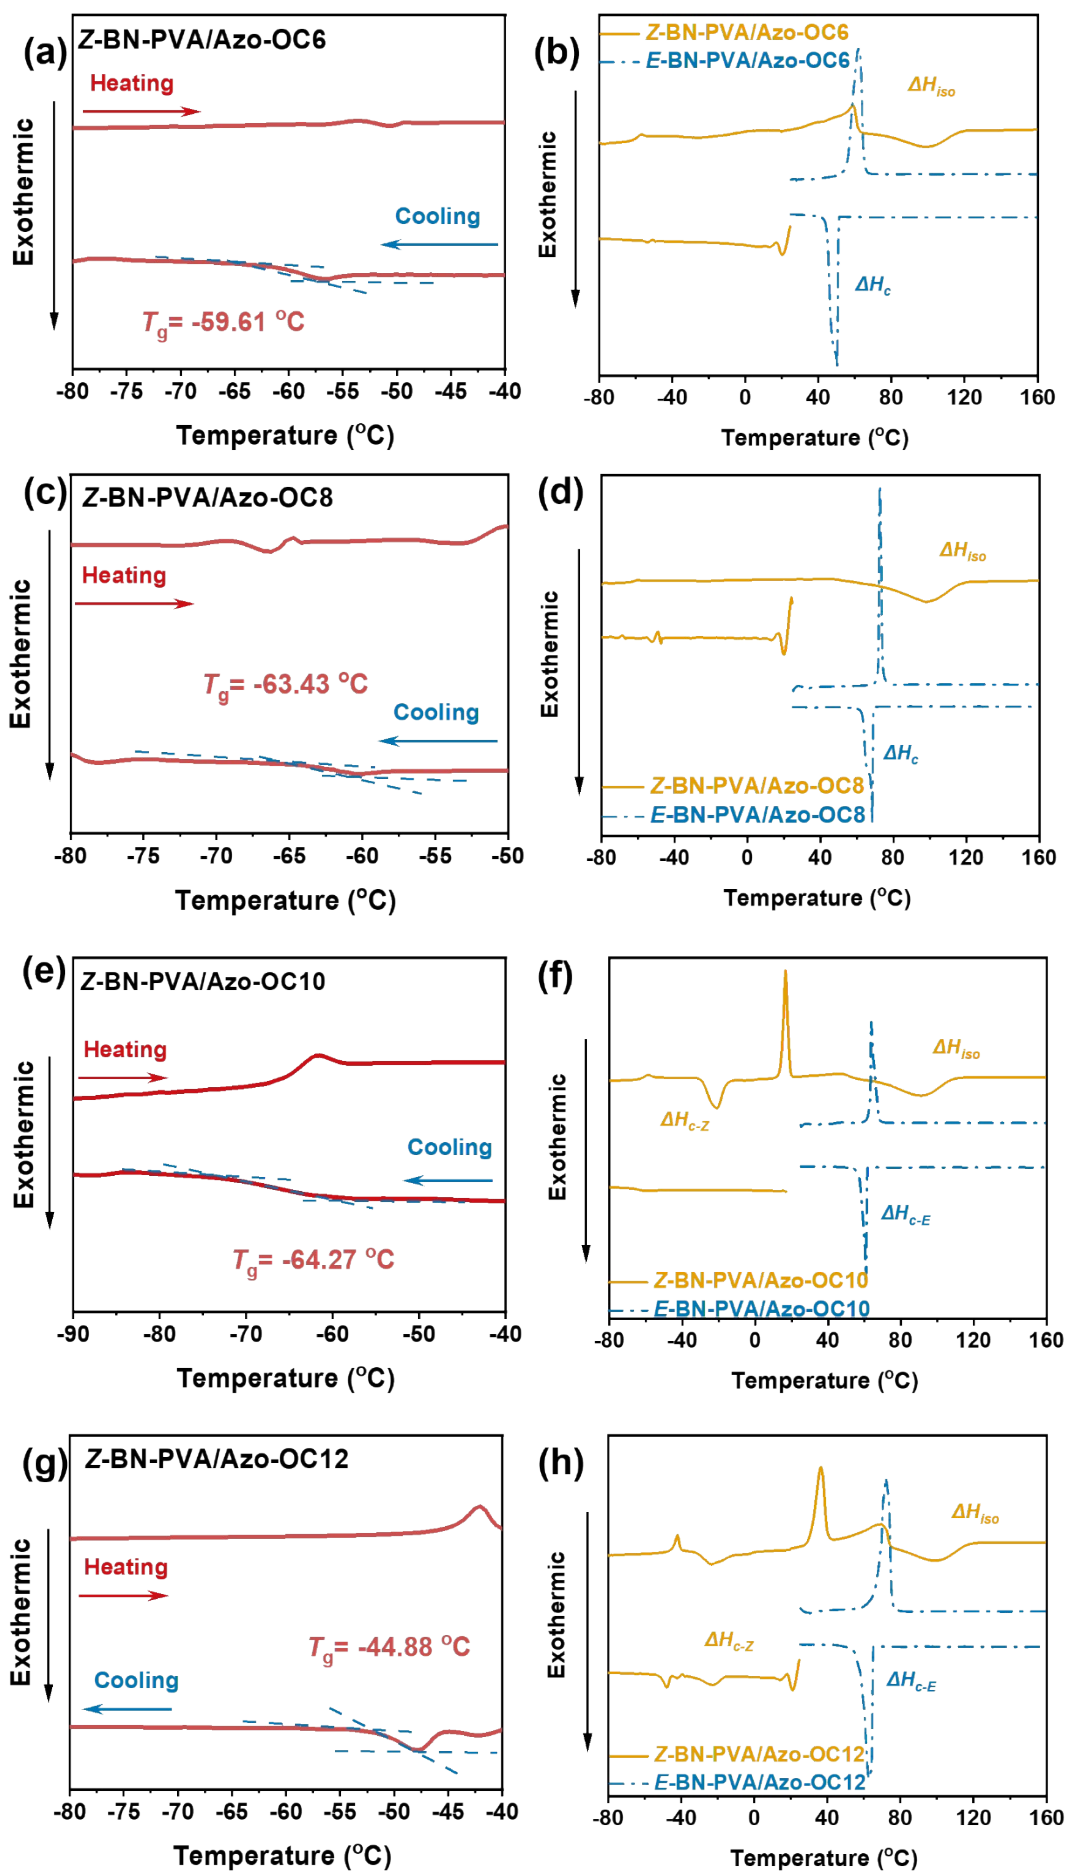

**Fig. S17** DSC curves on  $T_g$  of (a) Z-BN-PVA/Azo-OC6, (c) Z-BN-PVA/Azo-OC8, (e) Z-BN-PVA/Azo-OC10, and (g) Z-BN-PVA/Azo-OC12 from -80 to -40 °C at a heating and cooling rate of 10 °C min<sup>-1</sup>. DSC curves of (b) *E*-BN-PVA/Azo-OC6 (dotted blue line) and Z-BN-PVA/Azo-OC6 (straight yellow line), (d) *E*-BN-PVA/Azo-OC8 and Z-BN-PVA/Azo-OC8, (f) *E*-BN-PVA/Azo-OC10 and Z-BN-PVA/Azo-OC10 and (h) *E*-BN-PVA/Azo-OC12 and Z-BN-PVA/Azo-OC12 with the cooling and heating rate of 10 °C min<sup>-1</sup>.

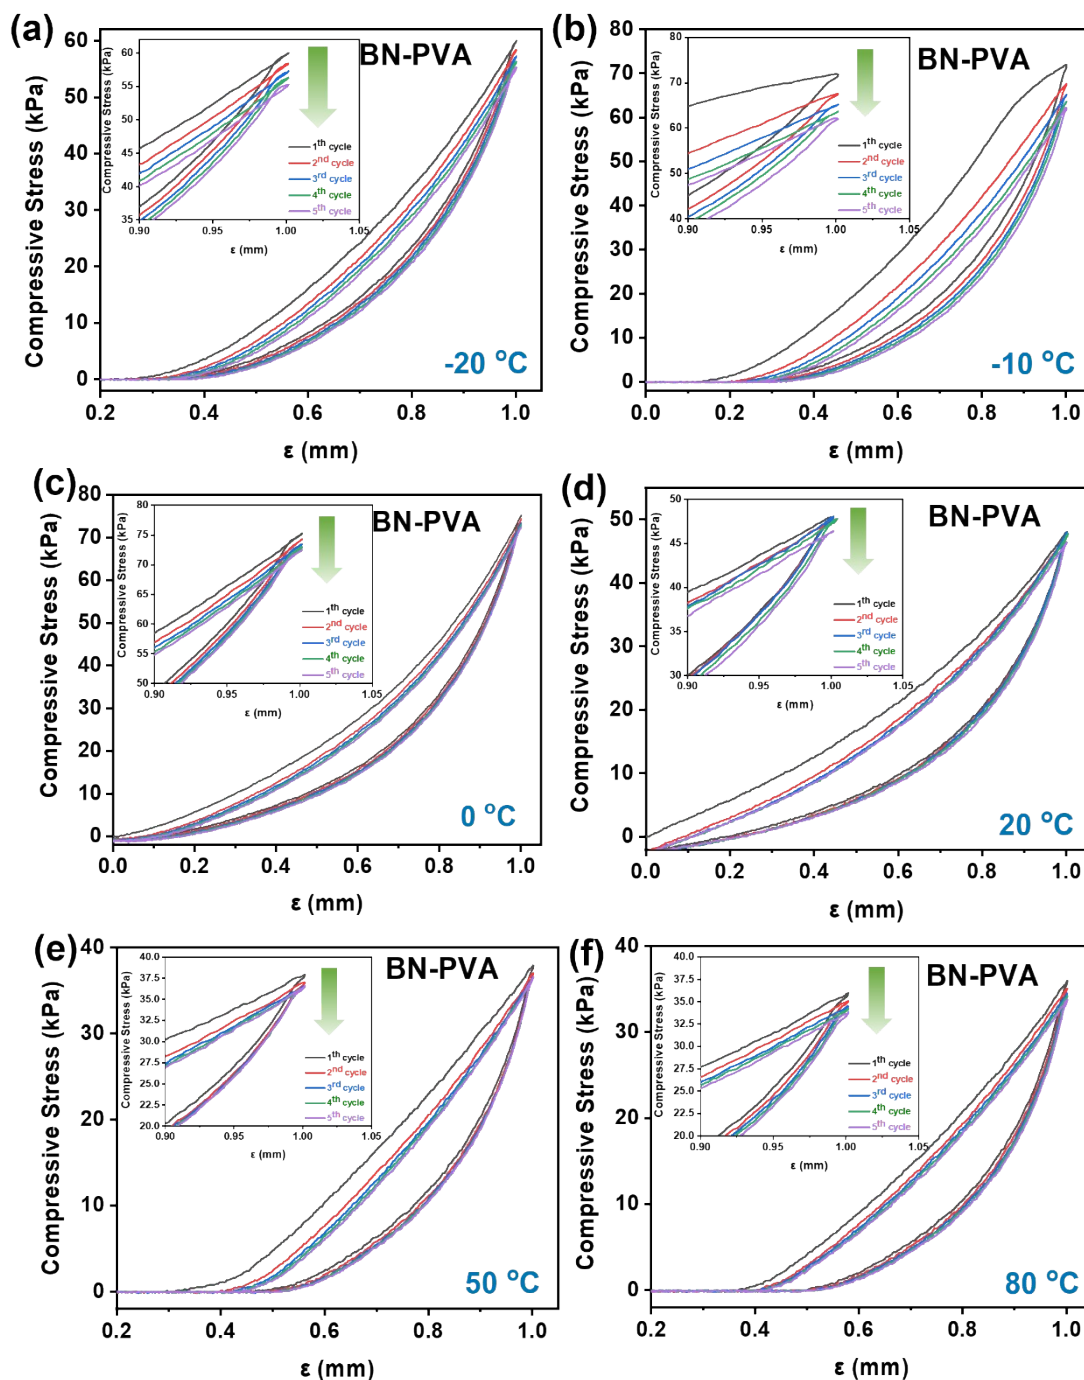

**Fig. S18** Comparative compression curves of BN-PVA aerogels at different

temperatures (-20°C to 80°C). (a) -20 °C, and insert graph is the magnified view of deformation ( $\epsilon$ ) between 0.9-1.05 mm, (b) -10 °C, and insert graph is the magnified view of deformation ( $\epsilon$ ) between 0.9-1.05 mm, (c) 0 °C, and insert graph is the magnified view of deformation ( $\epsilon$ ) between 0.9-1.05 mm, (d) 20°C, and insert graph is the magnified view of deformation ( $\epsilon$ ) between 0.9-1.05 mm, (e) 50 °C, and insert graph is the magnified view of deformation ( $\epsilon$ ) between 0.9-1.05 mm, (f) 80 °C, and insert graph is the magnified view of deformation ( $\epsilon$ ) between 0.9-1.05 mm.

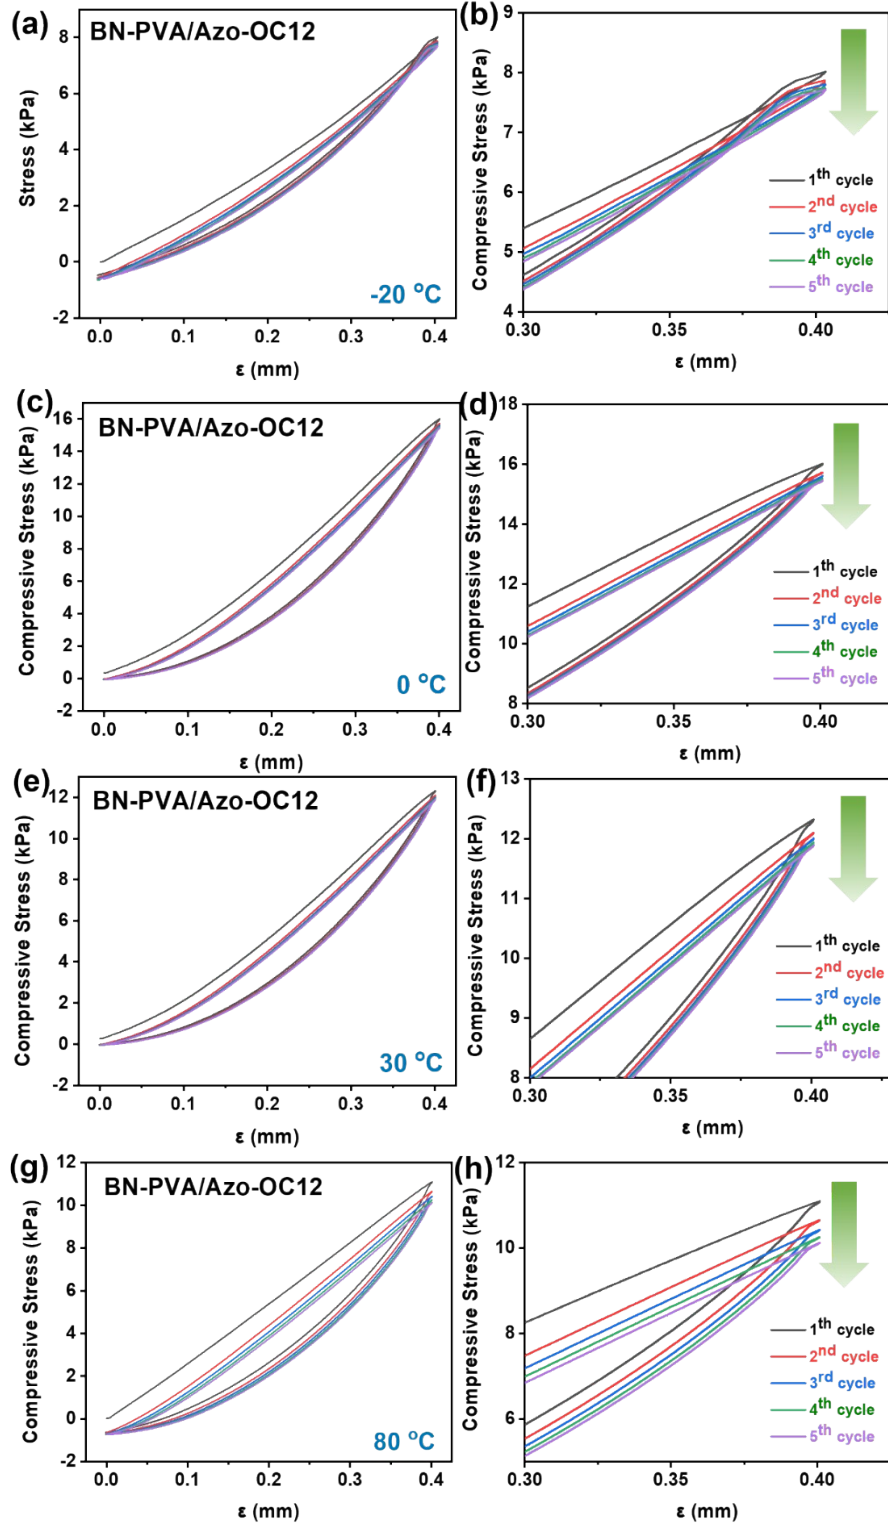

**Fig. S19** Comparative compression curves of BN-PVA/Azo-OC12 composite aerogel at different temperatures. (a) -20 °C, (b) the magnified view at -20°C, (c) 0 °C, (d) the magnified view at 0°C, (e) 30 °C, (f) the magnified view at 30°C, (g) 80 °C, (h) the magnified view at 80°C.



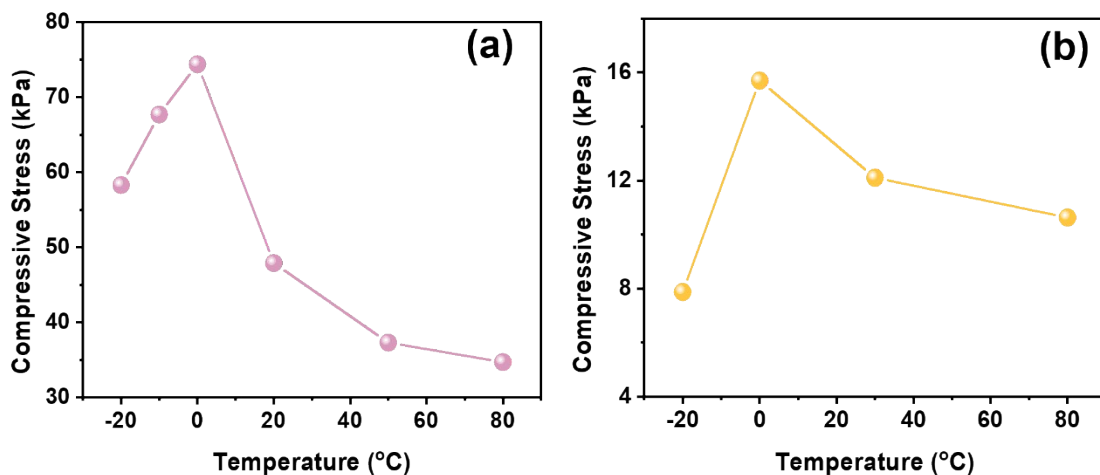

**Fig. S20** Comparative curves of compressive stress and deformation ( $\epsilon$ ) of BN-PVA aerogel (a) and BN-PVA/Azo-OC12 composite aerogel (b) at different temperatures.

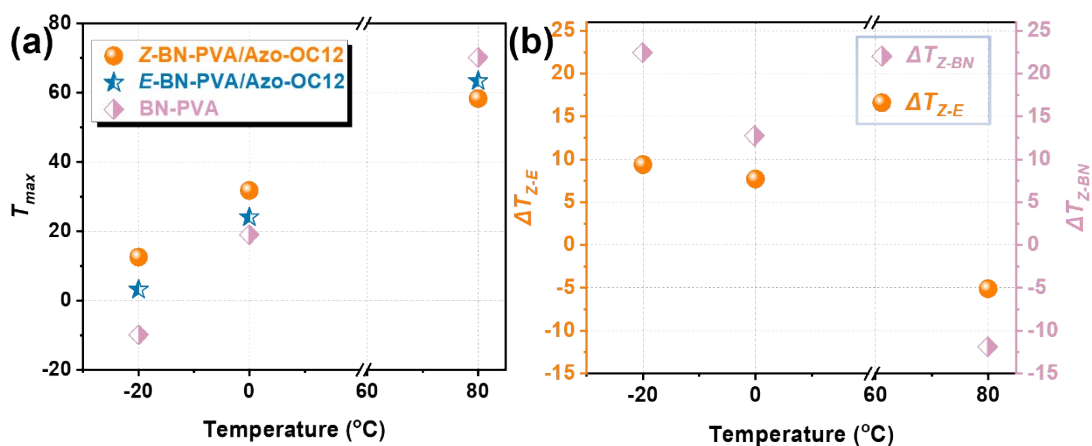

**Fig. S21** (a) Statistical comparison plots of the maximum values of exothermic temperatures ( $T_{max}$ ) of BN-PVA, E-BN-PVA/Azo-OC12, and Z-BN-PVA/Azo-OC12 at -20°C, 0°C, and 80°C. (b) Statistical plots of the exothermic temperature difference between E-BN-PVA/Azo-OC12 and Z-BN-PVA/Azo-OC12 ( $\Delta T_{Z-E}$ ), BN-PVA and Z-BN-PVA/Azo-OC12 ( $\Delta T_{Z-BN}$ ) at the same temperature.

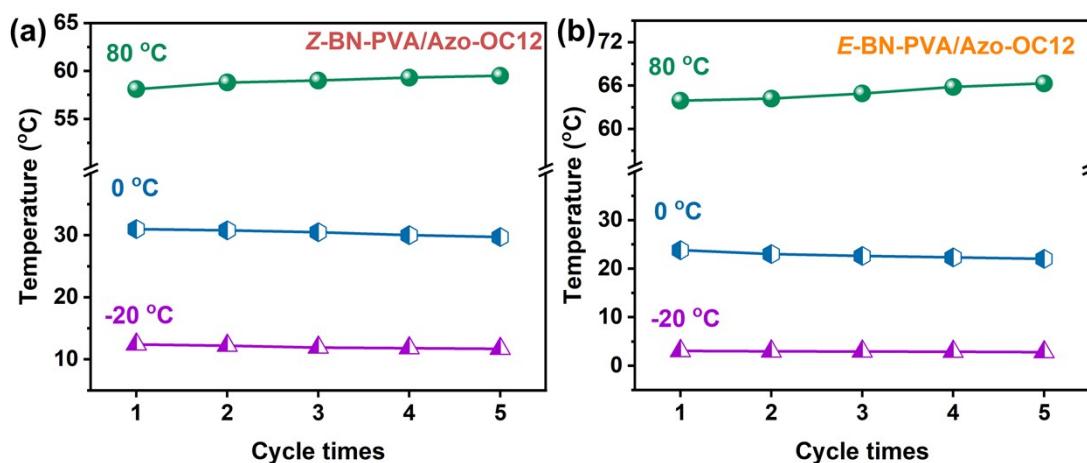

**Fig. S22.** The maximum exothermic temperature statistics graph of heat release after each cycle in 5 charge-discharge cycles. (a) Z-BN-PVA/Azo-OC12; (b) E-BN-PVA/Azo-OC12.

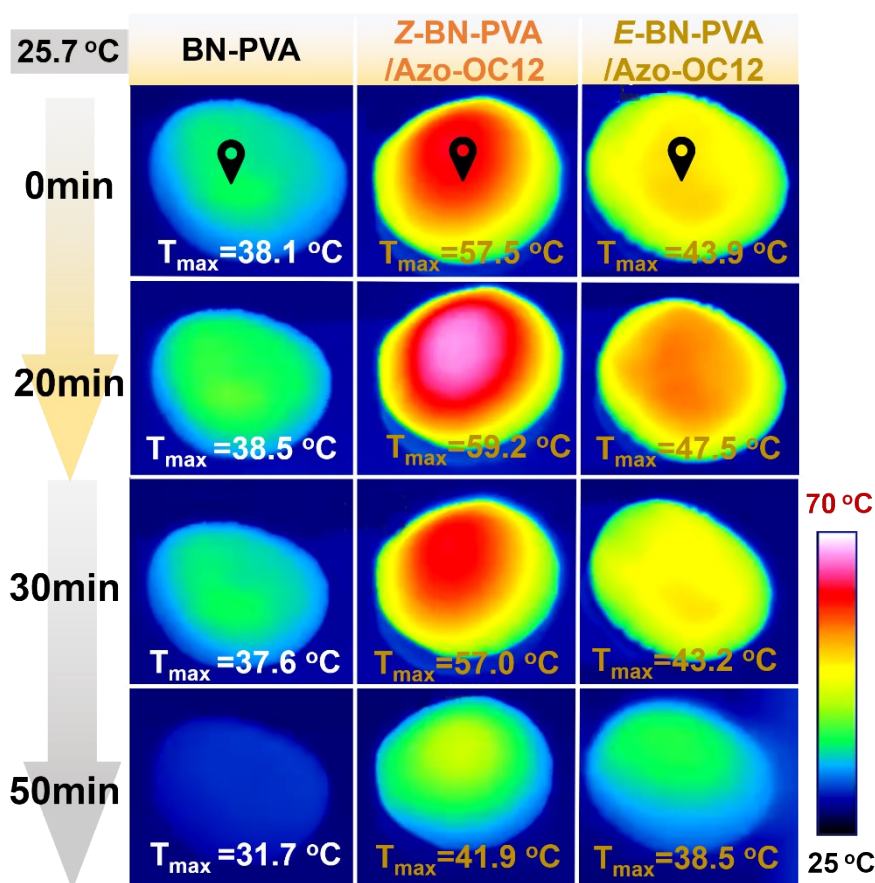

**Fig. S23** Heat release at room temperature (25.7 °C). Time-evolved IR thermal imaging with BN-PVA, Z-BN-PVA/Azo-OC12 and E-BN-PVA/Azo-OC12 for one cycle, including Sunlight irradiation (yellow arrow) for 20 min and natural exotherm (gray arrow) for the succeeding 18 min.  $T_{max}$  is the maximum temperature displayed in the infrared thermal imager.

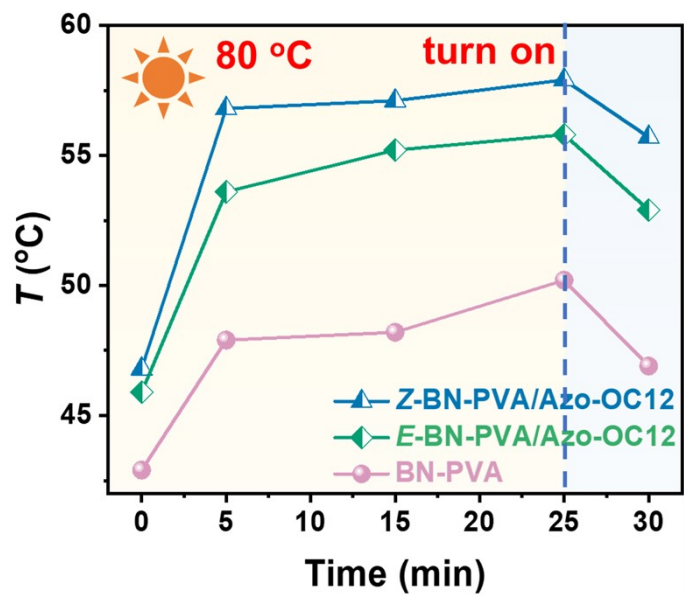

**Fig. S24** Plot of exothermic temperature ( $T$ ) versus time at high temperature (80 °C) for BN-PVA, Z-BN-PVA/Azo-OC12 and E-BN-PVA/Azo-OC12.

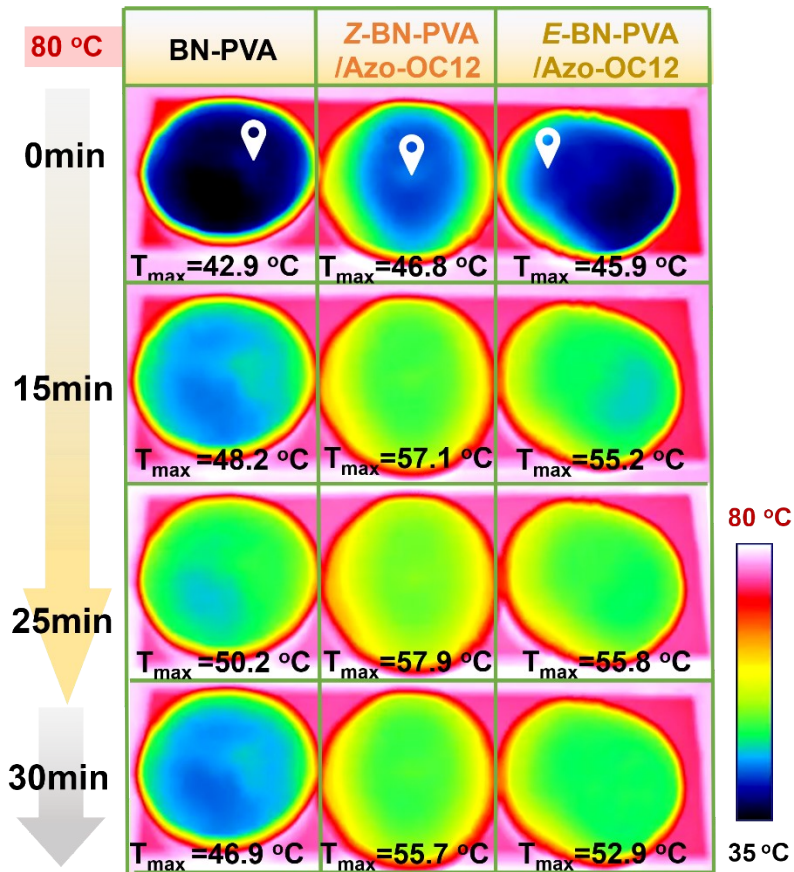

**Fig. S25 Heat release at high temperature (80 °C).** Time-evolved IR thermal imaging with BN-PVA, Z-BN-PVA/Azo-OC12 and E-BN-PVA/Azo-OC12 for one cycle, including Sunlight irradiation (yellow arrow) for 25 min and natural exotherm (gray arrow) for the succeeding 5 min.  $T_{max}$  is the maximum temperature displayed in the infrared thermal imager.

## Supplementary Tables

**Table S1** The porosity ( $P$ ) and the filling ratio ( $F$ ) of BN-PVA/Azo-OC $n$  ( $n = 6, 8, 10, 12$ ) aerogels.

| Samples         | $P$ (%) | $F$ (%) |
|-----------------|---------|---------|
| BN-PVA/Azo-OC6  | 90.14   | 80.02   |
| BN-PVA/Azo-OC8  | 91.24   | 81.21   |
| BN-PVA/Azo-OC10 | 93.89   | 83.75   |
| BN-PVA/Azo-OC12 | 91.10   | 81.77   |

**Table S2** Element content of BN-PVA and BN-PVA/Azo-OC $n$  ( $n = 6, 8, 10, 12$ ) aerogels.

| Sample          | Element content (%) |      |       |      |
|-----------------|---------------------|------|-------|------|
|                 | C                   | N    | O     | B    |
| BN-PVA          | 60.11               | 5.02 | 30.9  | 3.95 |
| BN-PVA/Azo-OC6  | 74.82               | 7.11 | 13.79 | 4.18 |
| BN-PVA/Azo-OC8  | 76.18               | 7.46 | 13.26 | 3.09 |
| BN-PVA/Azo-OC10 | 78.79               | 7.45 | 9.64  | 4.11 |
| BN-PVA/Azo-OC12 | 80.46               | 7.37 | 8.43  | 3.74 |

**Table S3** Total specific surface area, micropore specific surface area, pore volume, micropore volume percentage, and average pore diameter of BN-PVA aerogel.

| Sample | Surface Area<br>( $\text{m}^2 \text{g}^{-1}$ ) | Micropore<br>Area<br>( $\text{m}^2 \text{g}^{-1}$ ) | Micropore<br>volume ( $\text{cm}^3 \text{g}^{-1}$ ) | Microporous volume<br>percentage<br>( $\text{cm}^3 \text{g}^{-1}$ ) | Average pore<br>diameter<br>(nm) |
|--------|------------------------------------------------|-----------------------------------------------------|-----------------------------------------------------|---------------------------------------------------------------------|----------------------------------|
| BN-PVA | 70.61                                          | 9.89                                                | 0.094                                               | 15.96%                                                              | 52.86                            |

**Table S4** The  $Z$ -to- $E$  and  $E$ -to- $Z$  isomerization rate constants ( $k_{\text{rev}}$ ) and half-lives ( $t_{1/2}$ ) of BN-PVA/Azo-OC $n$  ( $n = 6, 8, 10, 12$ ) under dark at LT, light at LT, light at RT, and UV light conditions.

| Samples         | Dark at LT                            |              | Light at LT                           |                | Light at RT                           |                | UV                                    |                |
|-----------------|---------------------------------------|--------------|---------------------------------------|----------------|---------------------------------------|----------------|---------------------------------------|----------------|
|                 | $\kappa_{rev}(\times 10^{-6} s^{-1})$ | $t_{1/2}(h)$ | $\kappa_{rev}(\times 10^{-4} s^{-1})$ | $t_{1/2}(min)$ | $\kappa_{rev}(\times 10^{-4} s^{-1})$ | $t_{1/2}(min)$ | $\kappa_{rev}(\times 10^{-4} s^{-1})$ | $t_{1/2}(min)$ |
| BN-PVA/Azo-OC6  | 24.33                                 | 79.17        | 9.41                                  | 12.27          | 16.80                                 | 6.88           | 22.12                                 | 5.22           |
| BN-PVA/Azo-OC8  | 18.67                                 | 103.15       | 9.03                                  | 12.78          | 14.43                                 | 8.00           | 12.24                                 | 9.44           |
| BN-PVA/Azo-OC10 | 14.25                                 | 135.12       | 5.90                                  | 19.60          | 11.09                                 | 10.42          | 10.70                                 | 10.80          |
| BN-PVA/Azo-OC12 | 11.01                                 | 175.04       | 2.76                                  | 41.93          | 8.75                                  | 13.20          | 8.44                                  | 13.68          |

**Table S5** The  $T_c$  ( $T_{c-E}$  and  $T_{c-Z}$ ),  $\Delta H_c$  ( $\Delta H_{c-E}$  and  $\Delta H_{c-Z}$ ),  $T_{iso}$ ,  $\Delta H_{iso}$ ,  $T_g$ , and  $\Delta H_{total}$  of BN-PVA/Azo-OCn ( $n = 6, 8, 10, 12$ , respectively).

| Samples         |            | $T_c$<br>(°C) | $\Delta H_c$<br>(J g <sup>-1</sup> ) | $T_{iso}$<br>(°C) | $\Delta H_{iso}$<br>(J g <sup>-1</sup> ) | $T_g$<br>(°C) | $\Delta H_{total}$<br>(J g <sup>-1</sup> ) |
|-----------------|------------|---------------|--------------------------------------|-------------------|------------------------------------------|---------------|--------------------------------------------|
| BN-PVA/Azo-OC6  | Z-Azo-OC6  | -             | -                                    | 95.16             | 144.5                                    | -59.61        | 239.1                                      |
|                 | E-Azo-OC6  | 50.86         | 94.6                                 | -                 | -                                        | -             |                                            |
| BN-PVA/Azo-OC8  | Z-Azo-OC8  | -             | -                                    | 95.42             | 138.8                                    | -63.43        | 240.3                                      |
|                 | E-Azo-OC8  | 58.54         | 101.5                                | -                 | -                                        | -             |                                            |
| BN-PVA/Azo-OC10 | Z-Azo-OC10 | -21.28        | 33.67                                | 98.04             | 129.0                                    | -64.27        | 282.5                                      |
|                 | E-Azo-OC10 | 60.73         | 119.8                                | -                 | -                                        | -             |                                            |
| BN-PVA/Azo-OC12 | Z-Azo-OC12 | -13.35        | 42.88                                | 99.42             | 112.7                                    | -44.88        | 284.7                                      |
|                 | E-Azo-OC12 | 62.85         | 129.1                                | -                 | -                                        | -             |                                            |

**Table S6** The  $T_{Z-max}$ ,  $T_{E-max}$ ,  $T_{BN-max}$ ,  $\Delta T_{Z-E}$ , and  $\Delta T_{Z-BN}$  at -20 °C, 0 °C, and 80 °C measured by thermocouples for BN-PVA aerogel and BN-PVA/Azo-OC12 composite aerogel.

| Temperature (°C) | $T_{Z-max}$<br>(°C) | $T_{E-max}$<br>(°C) | $T_{BN-max}$<br>(°C) | $\Delta T_{Z-E}$<br>(°C) | $\Delta T_{Z-BN}$<br>(°C) |
|------------------|---------------------|---------------------|----------------------|--------------------------|---------------------------|
| -20              | 12.55               | 3.16                | -9.9                 | 9.39                     | 22.45                     |
| 0                | 31.75               | 24.05               | 19                   | 7.7                      | 12.75                     |
| 80               | 58.3                | 63.4                | 70.18                | -5.1                     | -11.88                    |

**Table S7** The  $T_{max}$ ,  $T_{min}$ , and  $\Delta T_{total}$  of BN-PVA, E-BN-PVA/Azo-OC12, and Z-BN-PVA/Azo-OC12 measured by thermocouples during the warming process from -20 °C to 80 °C.

|                          | $T_{max}$ (°C) | $T_{min}$ (°C) | $\Delta T_{total}$ (°C) |
|--------------------------|----------------|----------------|-------------------------|
| <b>BN-PVA</b>            | 70.4           | -8.7           | 79.1                    |
| <b>E-BN-PVA/Azo-OC12</b> | 63.84          | 4.43           | 68.27                   |
| <b>Z-BN-PVA/Azo-OC12</b> | 58.4           | 7.1            | 65.5                    |

**Table S8** The surface temperatures of BN-PVA, E-BN-PVA/Azo-OC12, and Z-BN-PVA/Azo-OC12 at -20 °C as a function of time.

| Time (min) | $T_{BN-PVA}$ (°C) | $T_{E-BN-PVA/Azo-OC12}$ (°C) | $T_{Z-BN-PVA/Azo-OC12}$ (°C) |
|------------|-------------------|------------------------------|------------------------------|
| 0 min      | -5                | -5                           | -5.1                         |
| 10 min     | -4.8              | 10.4                         | 13.7                         |
| 35 min     | 7.3               | 21.3                         | 29.2                         |
| 60 min     | 5.8               | 15.1                         | 18.8                         |
| 80 min     | 3.6               | 4.3                          | 4.6                          |

**Table S9** The surface temperatures of BN-PVA, E-BN-PVA/Azo-OC12, and Z-BN-PVA/Azo-OC12 at -25.7 °C as a function of time.

| Time (min) | BN/PVA | E-BN-PVA/Azo-OC12 | Z-BN-PVA/Azo-OC12 |
|------------|--------|-------------------|-------------------|
| 0min       | 38.1   | 43.9              | 57.5              |
| 5 min      | 39.9   | 50.5              | 60.1              |
| 20 min     | 38.5   | 47.5              | 59.2              |
| 30 min     | 37.6   | 43.2              | 57                |
| 50 min     | 31.7   | 38.5              | 41.9              |

**Table S10** The surface temperatures of BN-PVA, E-BN-PVA/Azo-OC12, and Z-BN-PVA/Azo-OC12 at 80 °C as a function of time.

| Time (min) | BN/PVA | E-BN-PVA/Azo-OC12 | Z-BN-PVA/Azo-OC12 |
|------------|--------|-------------------|-------------------|
| 0min       | 42.9   | 45.9              | 46.8              |
| 5 min      | 47.9   | 53.6              | 56.8              |
| 15 min     | 48.2   | 55.2              | 57.1              |
| 25 min     | 50.2   | 55.8              | 57.9              |
| 30 min     | 46.9   | 52.9              | 55.7              |

## Supplementary Equations

### Equation S1

$$V_1 = r^2 \times h$$

$$V_2 = \frac{m}{\rho}$$

$$P = \frac{V_1 - V_2}{V_1}$$

where  $P$  is the porosity,  $V_1$  is the total volume of the BN-PVA aerogel,  $r$  is the diameter of the aerogel, and  $h$  is the thickness of the aerogel;  $V_2$  is the volume of BN-PVA,  $m$  is the mass of the aerogel, and  $\rho$  is the density of BN-PVA.

### Equation S2

$$V_3 = \frac{m_{total}}{\rho_1}$$

$$F = \frac{V_3}{V_1 - V_2}$$

where  $F$  represents the filling ratio,  $V_3$  is the volume of filled BN-PVA composite aerogel,  $m$  is the mass of the filled composite aerogel, and  $\rho$  is the density of the filled photo-controlled PCMs.

### Equation S3 [1]

$$\ln \left( \frac{A_\infty - A_t}{A_\infty - A_0} \right) = -\kappa_{rev} t$$

Where  $A_0$  is the absorption intensity of  $\pi$ - $\pi^*$  transition peak in the Z-Azo-OCn irradiated by UV light,  $A_t$  is the absorption intensity of  $\pi$ - $\pi^*$  transition peak reversing for “ $t$ ” time,  $A_\infty$  is the absorption intensity of  $\pi$ - $\pi^*$  transition peak after complete Z-reversion and  $\kappa_{rev}$  is Z-to-E isomerization rate constants under blue light or in darkness.

### Equation S4 [2]

$$t_{1/2} = \frac{\ln 2}{\kappa_{rev}}$$

Where  $t_{1/2}$  is the dark half-lives and  $\kappa_{rev}$  is Z-to-E isomerization rate constants under blue light or in darkness.

### Equation S5 [3]

$$\Delta H_{total-1} = \Delta H_{iso} + \Delta H_{c-E}$$

Where  $\Delta H_{total-1}$  is the total energy density,  $\Delta H_{c-E}$  is the crystallization enthalpies of the E-isomer, and the  $\Delta H_{iso}$  is the isomerization enthalpies. This formula is applied to two heat release processes of BN-PVA/Azo-OC6 and BN-PVA/Azo-OC8.



### Equation S6 [3]

$$\Delta H_{total-2} = \Delta H_{c-E} + \Delta H_{c-Z} + \Delta H_{iso}$$

Where  $\Delta H_{total-2}$  is the total energy density,  $\Delta H_{c-E}$  is the crystallization enthalpies of the *E*-isomer,  $\Delta H_{c-Z}$  is the crystallization enthalpies of the *Z*-isomer, and the  $\Delta H_{iso}$  is the isomerization enthalpies. This formula is applied to three heat release processes of BN-PVA/Azo-OC10 and BN-PVA/Azo-OC12.

### Notes and references

- [1] Q. Yan, Y. Zhang, Y. Dang, Y. Feng, W. Feng. Solid-state high-power photo heat output of 4-((3,5-dimethoxyaniline)-diazanyl)-2-imidazole/graphene film for thermally controllable dual data encoding/reading. *Energy Stor. Mater.* 2020; 24: 662-669.
- [2] H. Wang, Y. Feng, J. Gao, W. Fang, J. Ge, X. Yang, F. Zhai, Y. Yu, W. Feng. Metallic-ion controlled dynamic bonds to co-harvest isomerization energy and bond enthalpy for high-energy output of flexible self-heated textile. *Adv. Sci.* 2022; 9: 2201657.
- [3] H. Liu, J. Tang, L. Dong, H. Wang, T. Xu, W. Gao, F. Zhai, Y. Feng, W. Feng. Optically triggered synchronous heat release of phase-change enthalpy and photo-thermal energy in phase-change materials at low temperatures. *Adv. Funct. Mater.* 2020; 31: 2008496.
